# Supplementary material for: Overwhelming coexistence of negative differential resistance effect and RRAM
Source: Royal Society of Chemistry journal article supplement (doi:10.1039/c8cp03492c), 2018-01-01
Supplement: c8cp03492c1.pdf [file c8cp03492c1.pdf]

## Supporting information

# Overwhelming coexistence of negative differential resistance effect and RRAM

Tao Guo<sup>a,c</sup>, Bai Sun<sup>\*,a,b</sup>, Zhou Yu<sup>a</sup>, Hongbin Zhao<sup>d</sup>, Ming Lei<sup>a</sup>, Yong Zhao<sup>\*,a</sup>

<sup>a</sup> Key Laboratory of Advanced Technology of Materials, Ministry of Education of China, Southwest Jiaotong University, Chengdu 610031, China

<sup>b</sup> School of Physical Science and Technology, Southwest Jiaotong University, Chengdu, Sichuan 610031, China

<sup>c</sup> State Key Laboratory of Applied Optics, Changchun Institute of Optics and Fine Mechanics, Chinese Academy of Sciences, Changchun 130033, China

<sup>d</sup> State Key Laboratory of Advanced Materials for Smart Sensing, General Research Institute for Nonferrous Metals, Beijing, 100088, China

E-mail: [bsun@swjtu.edu.cn](mailto:bsun@swjtu.edu.cn) (B. Sun); [yzhao@swjtu.edu.cn](mailto:yzhao@swjtu.edu.cn) (Y. Zhao)

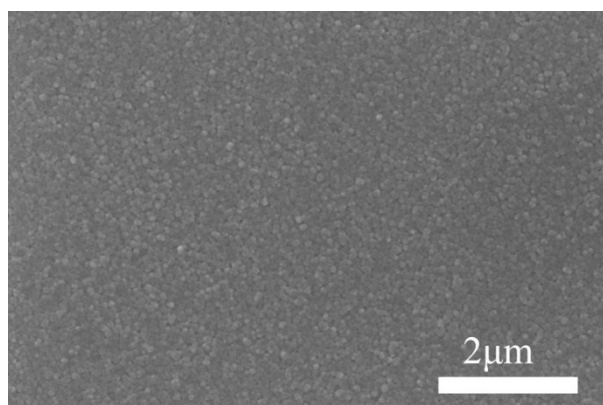

**Figure S1.** The surface morphology of the CZTSe film.

Figure S1 exhibits the surface morphology of the CZTSe film, the surface showed uniform and dense feature, the grain size ranged between 10~20 nm and no trace of holes or cracks.

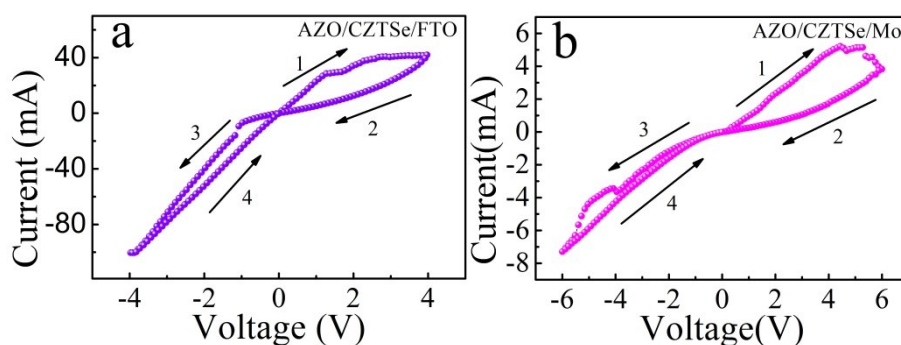

**Figure S2.** (a) The I-V curve of the AZO/CZTSe/FTO device. (b) The I-V curve of the AZO/CZTSe/Mo device.

In order to further confirm the NRD behavior is derived from the Schottky barrier, we changed the top electrode and bottom electrode shown in Figure S2a and Figure S2b, respectively. The results show that both of the two devices exhibited RS behaviors, but results showed no sign of NRD behaviors.

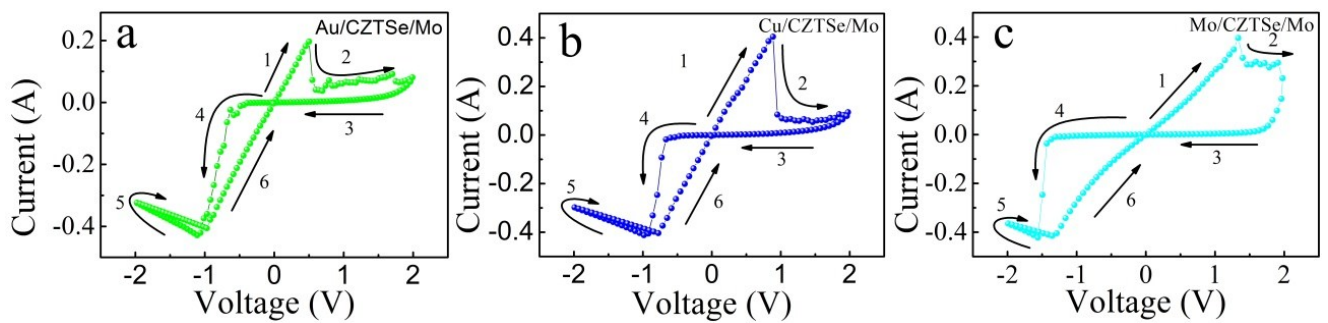

**Figure S3.** (a) The I-V curve of the Au/CZTSe/Mo device. (b) The I-V curve of the Cu/CZTSe/Mo device. (c) The I-V curve of the Mo/CZTSe/Mo device.

Figure S3a, Figure S3b, Figure S3c exhibit the I-V curve of the Au/CZTSe/Mo device, Cu/CZTSe/Mo device and Mo/CZTSe/Mo device, respectively. The results show that all the devices show coexistence of RS and NRD behaviors and similar to the Ag/CZTSe/Mo device, indicating that structure Schottky barrier at the two sides of the CZTSe thin film is necessary.
